# Supplementary material for: Inhibition of the mitochondrial pyruvate carrier simultaneously mitigates hyperinflammation and hyperglycemia in COVID-19
Source: PubMed Central journal article supplement (PMC9972900; doi:10.1126/sciimmunol.adf0348), 2023-02-23
Supplement: sciimmunol.adf0348_sm.pdf [file sciimmunol.adf0348_sm.pdf]

Supplementary Materials for

**Inhibition of the mitochondrial pyruvate carrier simultaneously mitigates hyperinflammation and hyperglycemia in COVID-19**

Bibo Zhu *et al.*

Corresponding author: Jie Sun, js6re@virginia.edu

*Sci. Immunol.* **8**, eadf0348 (2023)  
DOI: 10.1126/sciimmunol.adf0348

**The PDF file includes:**

Materials and Methods  
Figs. S1 to S14  
Table S1

**Other Supplementary Material for this manuscript includes the following:**

Data file S1  
MDAR Reproducibility Checklist

## **Supplementary Materials and Methods:**

### **Generation of mouse adapted SRAS-CoV-2 MA10 stocks**

Mouse adapted SARS-CoV-2 (MA10 variant) (BEI Resources, Cat # NR-55329) was generated by passaging on Vero E6 cells at 37°C (passage 2, SARS-CoV-2 P2) (30). SARS-CoV-2 MA10 P2 was used for all *in vivo* experiments. Working stock titers were determined using plaque assay. Vero E6 cells were cultured in Dulbecco's modified Eagle's medium (DMEM, Gibco) with the addition of 2% Fetal Clone II serum (Hyclone) and 1% Pen/Strep/glutamate. Serial dilutions were added to the cells. The plate was incubated at 37°C, 5% CO<sub>2</sub> for 1 hour, shaking the plates every 15 minutes. After incubation, monolayers were overlaid with media containing 1.2% Avicel PH-101 (Sigma Aldrich, St. Louis, MO) and incubated at 37°C, 5% CO<sub>2</sub>. After 72 hours, the overlay was removed, wells were fixed with 10% formaldehyde, and stained with 0.1% crystal violet to visualize plaques. Plaques were counted, and PFUs were calculated according to the following equation: Average # of plaques/dilution factor × volume diluted virus added to the well.

### **HIF-1 $\alpha$ inhibitor treatment *in vivo***

HIF-1 $\alpha$  inhibitor LW6 was purchased from TargetMol (Cat# T3494), and was dissolved in DMSO. For treatment of SARS-CoV-2 MA10-infected WT C57BL/6 mice, mice were administered by intraperitoneal daily with either DMSO as vehicle or 30 mg/kg LW6 in 200  $\mu$ l PBS from 6 hours post infection to 7 d.p.i. Mice were monitored for body weight change. At indicated time points, a subset of mice was euthanized and lung or BAL samples were collected for further analysis as described above.

### **Human monocytes and monocyte-derived macrophages culture and treatment *in vitro***

Human monocytes cells from healthy donors were isolated from whole blood. Before applying the MACS® systems, 10 mL whole blood were diluted with 10 mL PBS, and then added 10 mL Ficoll-Paque (Cytiva) to the bottom of the tube. Peripheral blood mononuclear cells (PBMC) were isolated by density gradient centrifugation (400g, 40 min, room temperature). Monocytes were isolated from PBMC by MACS® CD14 MicroBeads (Miltenyi Biotec, Cat# 130-050-201) according to the manufacturer's protocol. Monocytes were cultured in RPMI-1640 supplemented with 10% FBS and 1% Pen/Strep/glutamate at 37°C and 5% CO<sub>2</sub>. To obtain monocytes derived

macrophages (M<sub>DM</sub>), monocytes were incubated with 50 ng/mL of M-CSF for 7 days with 1/3 of medium renewed at day 3. For Poly IC treatment, monocytes or M<sub>DM</sub> were pre-treated with DMSO (vehicle) or MSDC (10  $\mu$ M) for two hours, then, cells were stimulated with or without Poly IC (5 $\mu$ g/mL) for 24 hours and were analyzed by quantitative RT-PCR.

### **Mouse BAL Fluid**

BAL fluid was obtained by flushing the airway three times with a single inoculum of 600  $\mu$ L sterile PBS via a trachea incision. Cells in BAL fluid was spun down for flow cytometry analysis and supernatants were collected for the determination of cytokines/chemokines levels, protein concentration and viral titers.

### **ELISA analysis of BAL cytokines**

50  $\mu$ l of each BAL sample was analyzed with the ELISA using commercially available kits for mouse IL-1 $\beta$  (Biolegend, Cat# 432604), TNF- $\alpha$  (Biolegend, Cat# 430904), IL-6 (Biolegend, Cat# 431304) and CCL2 (Biolegend, Cat# 432701) following the manufacturer's protocol. The VERSAmax microplate reader (Molecular Devices) was used for colorimetric quantification and analysis at 450 nm wavelength.

### **BCA protein assay**

BCA protein assay kit was obtained from Thermo Scientific (Cat# 23225). 2  $\mu$ l of each BAL sample was used. VERSAmax microplate reader (Molecular Devices) was used for colorimetric quantification and analysis at 570nm wavelength.

### **Virus titer measurement**

For IAV, the viral titers in the BAL were measured by endpoint dilution assay and expressed them as tissue culture infectious dose 50 per (TCID<sub>50</sub>) as described before (38). Briefly, Madin-Darby canine kidney cells (MDCK, The American Type Culture Collection) were grown in 96-well plates and incubated with 10-fold dilutions of BAL sample from IAV-infected mice with different treatments in serum-free DMEM medium. After a 3-day incubation at 37 °C in a humidified atmosphere of 5% CO<sub>2</sub>, the supernatants were collected and mixed with a half-volume of 0.5% chicken red blood cells (Rockland, Cat# R401-0100). After 30 min incubation at

room temperature (RT), the agglutination pattern was analyzed and the TCID<sub>50</sub> values were calculated.

For SARS-CoV-2 MA10, the viral titer in the BAL were determined using plaque assay. Vero E6 cells were cultured in DMEM with the addition of 2% Fetal Clone II serum (Hyclone) and 1% Pen/Strep/glutamate. Serial dilutions were added to the cells. The plate was incubated at 37°C and 5% CO<sub>2</sub> for 1 hour, shaking the plates every 15 minutes. After incubation, monolayers were overlaid with media containing 1.2% Avicel PH-101 and incubated at 37 °C and 5% CO<sub>2</sub>. After 72 hours, the overlay was removed, wells were fixed with 10% formaldehyde, and stained with 0.1% crystal violet to visualize plaques. Plaques were counted, and PFUs were calculated according to the following equation: Average # of plaques/dilution factor × volume diluted virus added to the well.

### **Mouse bone marrow derived macrophage (BMDM) culture and treatment *in vitro***

BMDM were isolated from bone marrow of C57BL/6 mice. The bone marrow cavities were repeatedly flushed with RPMI-1640 containing 10% FBS. After red cells were removed, the remained cells were cultured in RPMI-1640 supplemented with 50 ng/mL of M-CSF (Biolegend, Cat# 576404), 10% FBS and 1% Pen/Strep/glutamate at 37 °C and 5% CO<sub>2</sub> for 7 days with medium renewed at day 4. For Poly IC treatment, BMDMs were pre-treated with DMSO (vehicle) or MSDC (10 μM) for two hours, then, cells were stimulated with or without Poly IC (5μg/mL) for 24 hours and were analyzed by quantitative RT-PCR or western blot.

### **Lung immunofluorescence**

Paraffin-embedded lung tissue sections were deparaffinized in xylene and rehydrated. Heat-induced antigen retrieval was performed using Agilent Dako target retrieval solution (pH 9; Cat# S2367), followed by permeabilization with 0.1% Triton-X with 0.05% Tween-20 for 1 hour at room temperature. Sections were next stained with the following primary antibodies: Hamster anti-PDPN (1:750; Abcam, Cat# ab11936) or Rabbit anti-proSP-C (1:500; Millipore, Cat# AB3786) diluted in Agilent Dako Background reducing antibody diluent (Cat# S3022) overnight at 4 °C. Subsequently, samples were washed and incubated with fluorescent secondary antibodies: Goat anti-hamster AlexaFluor488 (1:400; Invitrogen, Cat# A-21110) and Donkey anti-rabbit DyLight 649 (1:125; Biolegend, Cat# 406406), in the dark for 2 hours at room

temperature. After washes, the samples were stained with DAPI (1:1000, ThermoFisher Scientific) for 3 minutes and mounted using ProLong Antifade mountant (ThermoFisher Scientific, Cat# P36930). Images were acquired using the Olympus BX63 fluorescent microscope and pseudocolours were assigned for visualization. For each lung section, images were taken in at least 10-12 random alveolar areas. All images were further processed using the ImageJ Fiji software.

### **Lung cell suspension preparation**

lungs of treated mice were cut into small pieces, and digested with Collagenase Type 2 (Worthington Biochemical) for 30 min at 37 °C. Cells were further passed through 70 µm cell strainer and washed with flow cytometry buffer. After red blood cell lysis, cells were centrifuged and re-suspended in appropriate buffer for flow cytometry analysis or stimulation *in vitro*.

### **RNA extraction**

For lung homogenate from IAV- or SARS-CoV-2-infected mice, human AMs with SARS-CoV-2 infection, lung cells from COVID-19 patient autopsy, RNA was extracted using the TRIzol/chloroform method (ThermoFisher, Cat# 15596018). For *in vitro* cultured mouse AMs and BMDM and human AMs, MdM, and monocytes, RNA was isolated using Total RNA purification kit and treated with DNase I (Sigma, Cat# RTN350) according to the manufacturer's instructions.

### **Quantitative RT-PCR**

Random primers and Moloney murine leukemia virus (MMLV) reverse transcriptase (Invitrogen, Cat# 28025021) were used to synthesize first-strand cDNAs from equivalent amounts of RNA from each sample. Quantitative PCR with reverse transcription (RT-qPCR) was performed with Fast SYBR Green PCR Master Mix (Applied Biosystems, Cat# 4385618). RT-qPCR was conducted in duplicates in QuantStudio3 (Applied Bioscience). Data were generated with the comparative threshold cycle (Delta CT) method by normalizing to hypoxanthine phosphoribosyltransferase (HPRT). Sequences of primers used in the studies are listed in Table S1.

## **Immunoprecipitation and Immunoblots**

Cells were lysed in RIPA buffer (Sigma, CAT# R0278) with a protease inhibitor cocktail (Sigma, CAT# P8340) and 4x sample loading buffer (containing SDS and 2-mercaptoethanol). Proteins were separated by electrophoresis through 4% -12% SDS-PAGE. For Immunoprecipitation assay, BMDM and AMs were stimulated with Poly IC in the presence of vehicle or MSDC overnight *in vitro*. 0.5  $\mu$ M MG132 were added 4 h before cell harvesting. Cells were lysed in RIPA buffer for 30 minutes on ice. A portion of the lysate was taken as the input, and the remaining lysate was immunoprecipitated using anti-HIF-1 $\alpha$  and subjected to Western blotting. The antibodies used in immunoblots and co- immunoprecipitations were as follows: HIF-1 $\alpha$  (Cell Signaling Technology, Cat# 14179S), NF- $\kappa$ B p65 (Cell Signaling Technology, Cat# 8242S), Phospho-NF- $\kappa$ B p65 (Cell Signaling Technology, Cat# 3033S), STAT1 (Cell Signaling Technology, Cat# 14994S), Phospho-STAT1 (Cell Signaling Technology, Cat# 9167S), acetyl lysine antibody (Abcam, Cat# ab21623), MPC2 (Cell Signaling Technology, Cat# 46141S), Histone H3 (Cell Signaling Technology, Cat# 4499S), acetyl-Histone H3 (Millipore, Cat# 06-599), Acetyl-Histone H3 (Lys27) (Cell Signaling Technology, Cat# 8173S) and GAPDH (Cell Signaling Technology, Cat# 97166S).

## **Lung histopathology**

Mice were perfused with PBS (10 mL) via the right ventricle following euthanasia. Paraformaldehyde (PF, 10%) was then gently instilled into the lung and left inflated for one minute before excising and moving lobe to 10% PF for 48 hours followed by transfer to ethanol (70%). Samples were shipped to Mayo Clinic Histology Core Lab (Scottsdale, AZ) where they were embedded in paraffin and 5  $\mu$ m sections were cut for Hematoxylin and eosin stain and immunofluorescence studies. The slides were scanned through the Aperio whole slide scanning system (Leica) and exported to image files. Lung histopathology was blindly scored using four random fields per tissue as previously described (35). Tissues were evaluated for the presence of edema or hyaline membranes using distribution-based ordinal scoring: 0, none; 1, <25%; 2, 26%-50%; 3, 51%-75%; 4, >75% of tissue fields. For perivascular infiltrates, the severity-based ordinal scoring was evaluated: 0, absent; 1, minor (solitary to loose infiltration); 2, moderate (small to medium aggregates); 3, severe (robust aggregates that are circumferential around vessels and extend into adjacent parenchyma). For interstitial scores, the severity for the

presence of interstitial disease was assessed: 0, absent; 1, minor (increased cellularity in septa and uncommon inflammatory cells extending into lumen); 3, severe (cellular infiltrates in thickened septa and filling in alveolar with atelectasis and/or diffuse alveolar damage). Final scores were obtained by averaging four fields per mouse.

### **Polyfunctional T cell analysis**

Single cell suspension of lungs from IAV-infected mice with DMSO or MSDC treatment were stimulated with PMA (0.1  $\mu\text{g}/\text{ml}$ ) and Ionomycin (1  $\mu\text{g}/\text{ml}$ ) (Sigma) for 5 h in the presence of 2 $\mu\text{M}$  monensin (BD Biosciences), and then stained with BV711 conjugated anti-CD8 Abs. Cells were fixed and permeabilized by fixation buffer and intracellular staining perm wash buffer (Biolegend, Cat# 420801), and stained with anti-IFN- $\gamma$  (Biolegend, Cat# 505808), anti-CCL3 (ThermoFisher, Cat# 50-7532-82) and anti-TNF- $\alpha$  (Biolegend, Cat# 506324) Abs for at least 30 min at RT. Samples were processed with flow cytometer.

### **Nanostring analysis**

Total RNA from lungs of IAV-infected mice or *in vitro* cultured human AMs with SARS-CoV-2 infection was used for Nanostring analysis. The mRNA expression was analyzed with the nCounter murine immunology panel including 561 targets or the nCounter human myeloid innate immunity panel including 770 targets on the nCounter platform (Nanostring Technologies, Seattle, WA, USA) using 50 ng of total RNA per sample as described previously (38).

Hybridization reaction was established by following the instruction of manufacture. Aliquots of Reporter Codeset and Capture probeset were thawed at room temperature. Then a master mix was created by adding 70  $\mu\text{l}$  of hybridization buffer to the tube containing the reporter codeset. 8  $\mu\text{l}$  of this master mix was added to each of tubes for different samples, 5  $\mu\text{l}$  (50 ng) of total RNA sample was added into each tube. Then 2  $\mu\text{l}$  of well mixed Capture probeset was added to each tube and placed in the preheated 65°C thermal cycler. All the sample mixes were incubated for 16 hours at 65°C for completion of hybridization. The cartridge with samples were loaded into the NanoString nCounter SPRINT Profiler machine. Data were normalized and analyzed using Nanostring software nSolver 4.0 (Nanostring Technologies). mRNA counts were processed to account for hybridization efficiency, background noise, and sample content, and were normalized using the geometric mean of housekeeping genes. Fold changes were calculated comparing the experimental group to their appropriate controls. Transcript counts less than the

mean of the negative control transcripts for each sample were considered as background. Clustering of differentially expressed genes for the heatmap was done using R language (<https://www.r-project.org/>). The Nanostring experiments were conducted once using multiple biological samples per group (as indicated in figures).



Figure S1

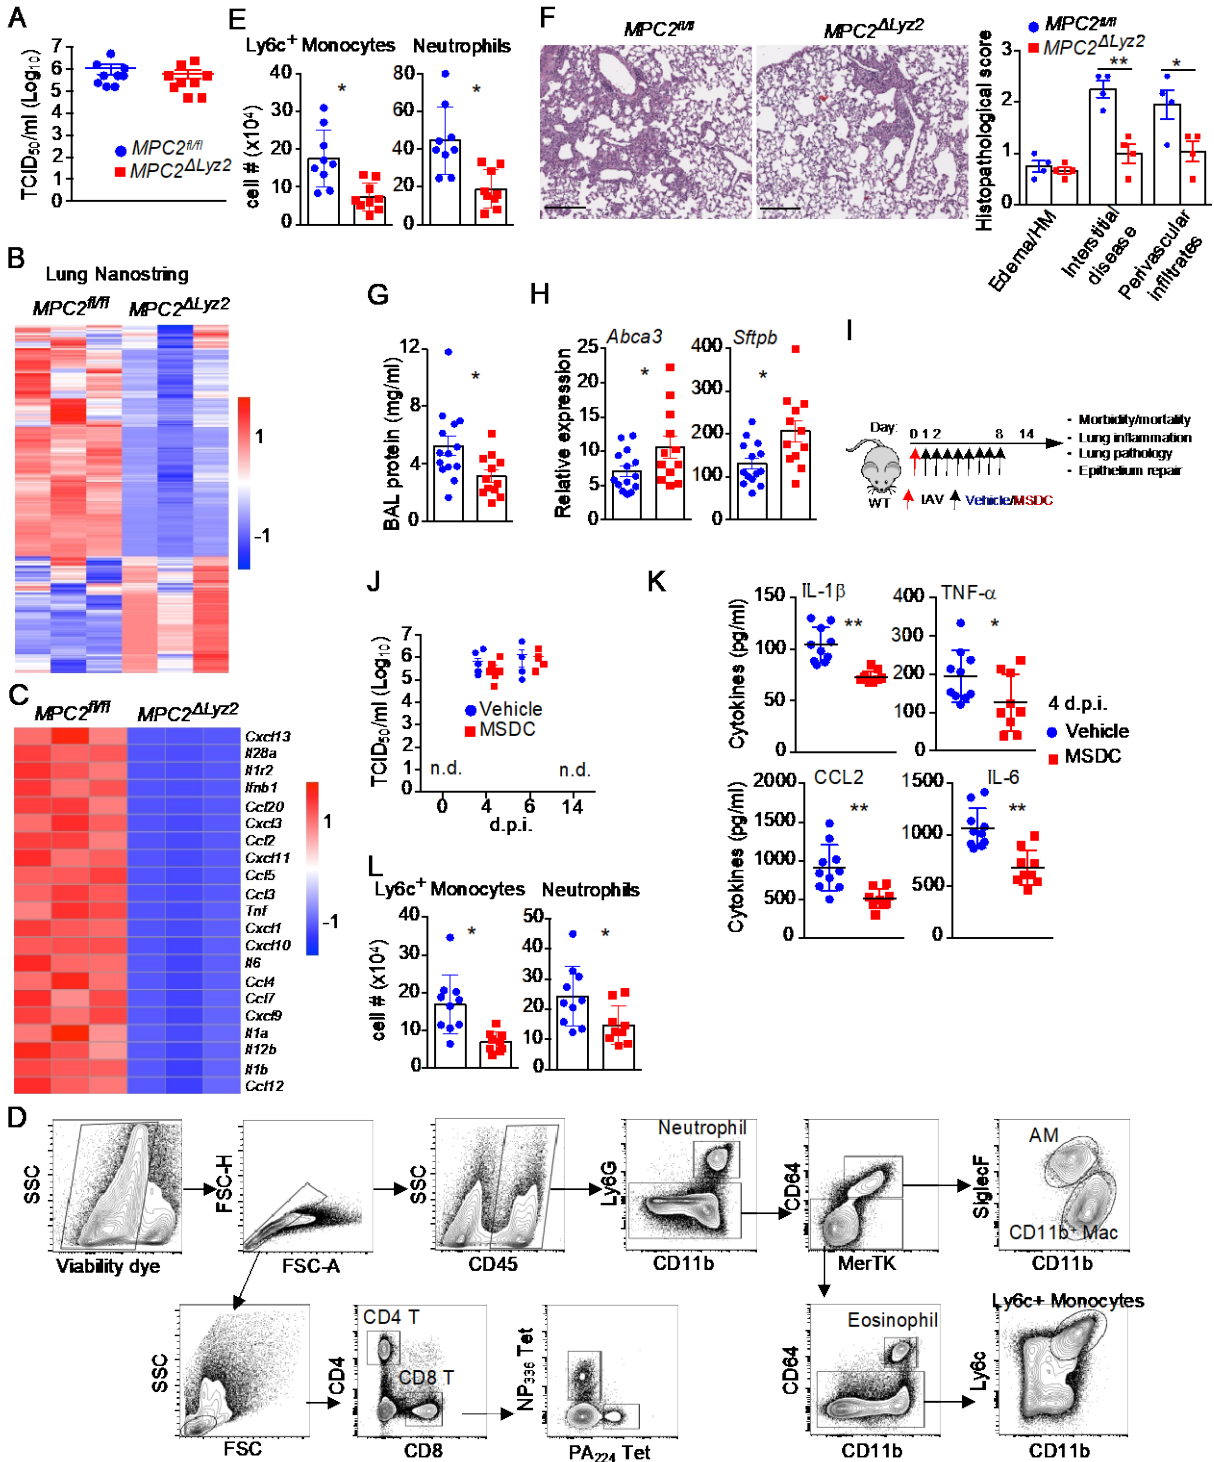

**Fig. S1. Myeloid-specific MPC2-deficiency diminishes IAV-induced lung inflammation.**

(A to H) *MPC2*<sup>fl/fl</sup> and *MPC2*<sup>ΔLyz2</sup> mice were infected with IAV. (A) BAL viral titers were measured at 4 d.p.i. (B and C) Nanostring analysis of the expression of 560 immune-related genes (Mouse Immunology Panel) in lungs at 4 d.p.i. (n = 3). Heatmap for total differentially expressed genes (B) or differentially expressed cytokine/chemokine genes (C) were shown. (D) Flow cytometry gating strategy for the identification of lung myeloid cells and lymphocytes. (E) Numbers of Ly6c<sup>+</sup> inflammatory monocytes and neutrophils in the BAL at 4 d.p.i. (F) Representative image of H&E staining of lung section (n = 4). Scale bar, 200 μm (left). Right, the quantification of pathological lesions at 14 d.p.i. HM, hyaline membranes. (G) Protein concentrations in the BAL fluid at 14 d.p.i. (H) *Abca3* and *Sftpb* gene expression in the lungs at 14 d.p.i. (I to L) C57BL/6 WT mice were infected with IAV and treated with vehicle or MSDC. (I) Schematic diagram. (J) BAL viral titers were measured at the indicated time points (n = 5-10). n.d., not detected. (K) Cytokine levels in the BAL at 4 d.p.i. (n = 9-10). (L) Numbers of Ly6c<sup>+</sup> inflammatory monocytes and neutrophils in the BAL at 4 d.p.i. (n = 9-10). Pooled data (A, E, G, H, J, K, and L) from at least two independent experiments. Data are presented as means ± SEM. \*, *p* < 0.05; \*\*, *p* < 0.01. The *p* value was determined by a two-tailed Student's t-test for (A, E, F, G, H and J to L).

Figure S2

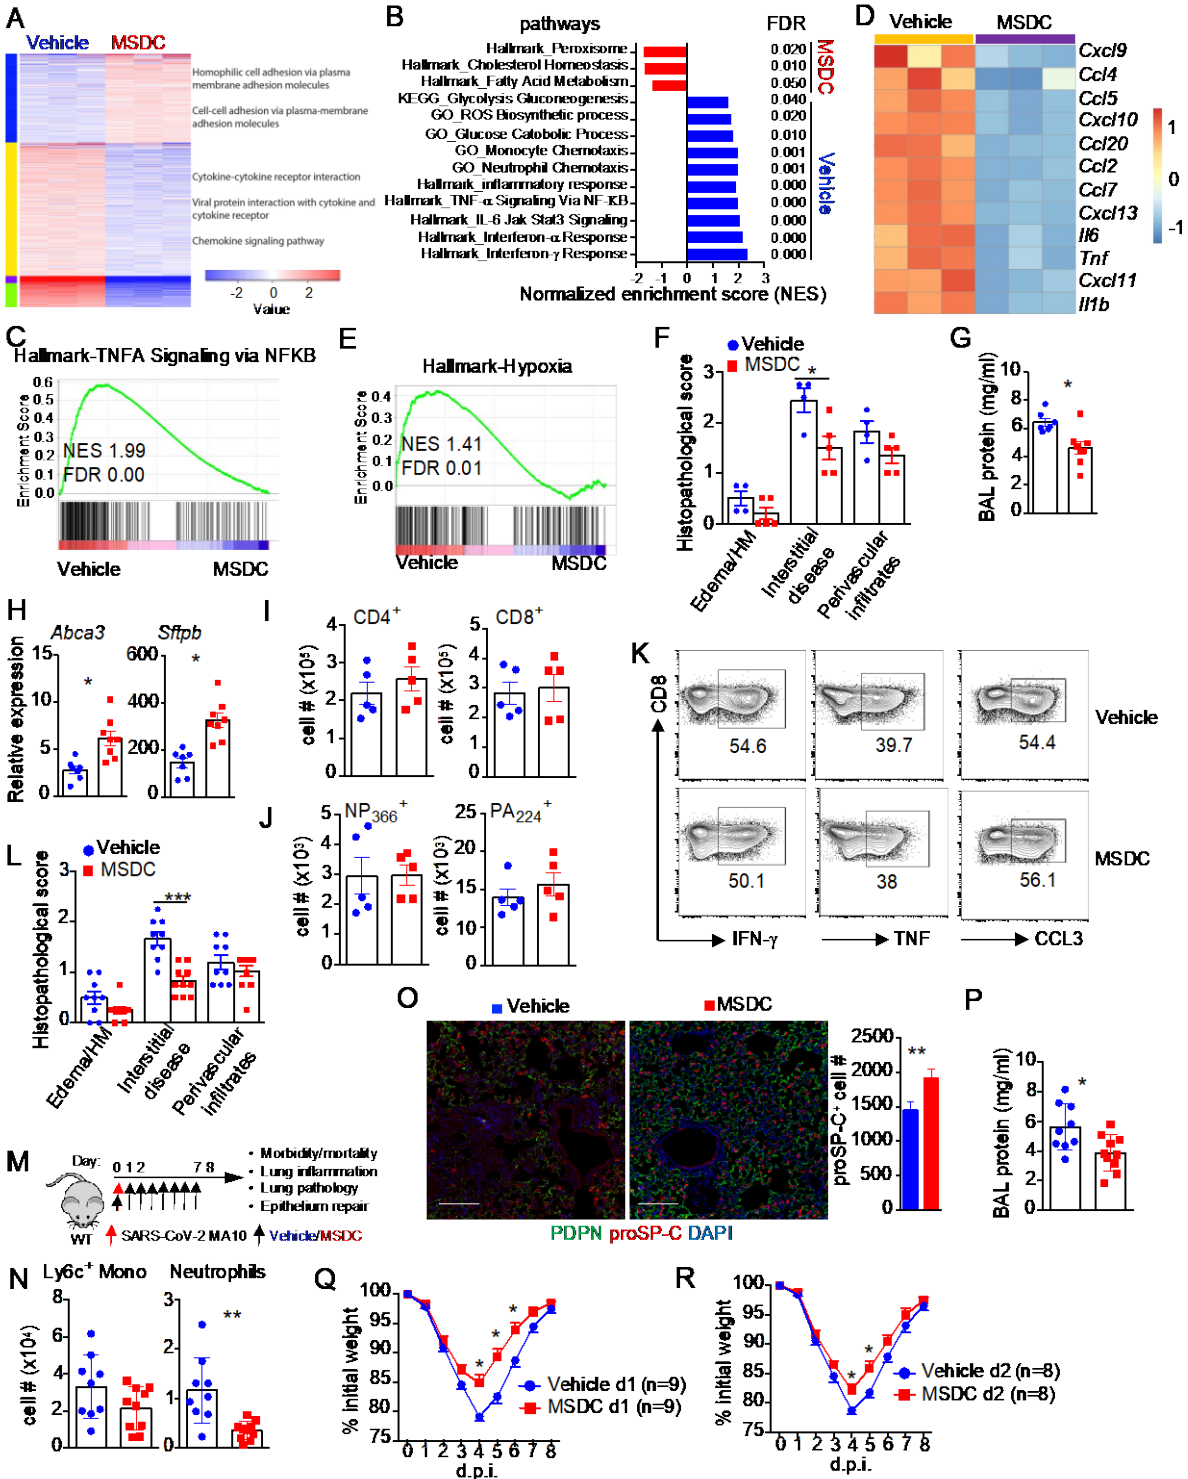

**Fig. S2. MSDC treatment decreases pulmonary inflammation without altering host antiviral immunity following IAV or SARS-CoV-2 infection.**

(A to K) C57BL/6 WT mice were infected with IAV and treated with vehicle or MSDC. (A to E) RNA-seq analysis of lungs at 4 d.p.i. (n = 3). (A) Heatmap of differentially expressed genes. (B) Normalized enrichment scores of gene sets from Hallmark, GO, and KEGG dataset. (C) GSEA of TNF signaling gene set was shown. (D) Heatmap showing differentially expressed cytokines. (E) GSEA of hypoxia gene set was shown. (F) The quantification of pathological lesions at 14 d.p.i. for Fig. 1I. HM, hyaline membranes. (G) Protein concentrations in the BAL at 14 d.p.i. (n = 7-8). (H) *Abca3* and *Sftpb* gene expression in the lungs at 14 d.p.i. (n = 7-8). (I to K) The antiviral immunity mediated by adaptive immune response was measured at 6 d.p.i. (n = 5). Lung total CD4<sup>+</sup> and CD8<sup>+</sup> T cells (I), and NP336 and PA224 tetramer<sup>+</sup> CD8<sup>+</sup> T cells (J) were enumerated. (K) Representative flow cytometry plots of IFN- $\gamma$ , TNF and CCL3 production in polyclonal CD8<sup>+</sup> T cells after PMA and ionomycin stimulation at 6 d.p.i. (L to P) C57BL/6 WT mice were infected with SARS-CoV-2 MA10 virus and treated with vehicle or MSDC (n = 9-10). (L) The quantification of pathological lesions at 8 d.p.i. for Fig. 1L. HM, hyaline membranes. (M) Schematic diagram. (N) Numbers of Ly6c<sup>+</sup> inflammatory monocytes and neutrophils in the BAL at 8 d.p.i. (O) Fluorescence microscopy images of PDPN (marker for alveolar type I epithelial cells), proSP-C (marker for alveolar type II epithelial cells) and DAPI staining in fixed lung tissues at 8 d.p.i. (n=5). Scale bar, 50  $\mu$ m. Quantification of proSP-C<sup>+</sup> cell number was performed using at least 10 random fields (10x) of alveolar space per mouse lung. (P) Protein concentrations in the BAL at 8 d.p.i. (Q and R) WT mice were infected with SARS-CoV-2 MA10 virus and treated with vehicle or MSDC from day 1 (Q) or day 2 (R) post infection. Pooled data (G, H, N, and P to R) from at least two independent experiments. Data are presented as means  $\pm$  SEM. \*,  $p < 0.05$ ; \*\*,  $p < 0.01$ . The  $p$  value was determined by a two-tailed Student's t-test (F, G, H, I, J, L, N, and P) or multiple t-tests (Q and R).

Figure S3

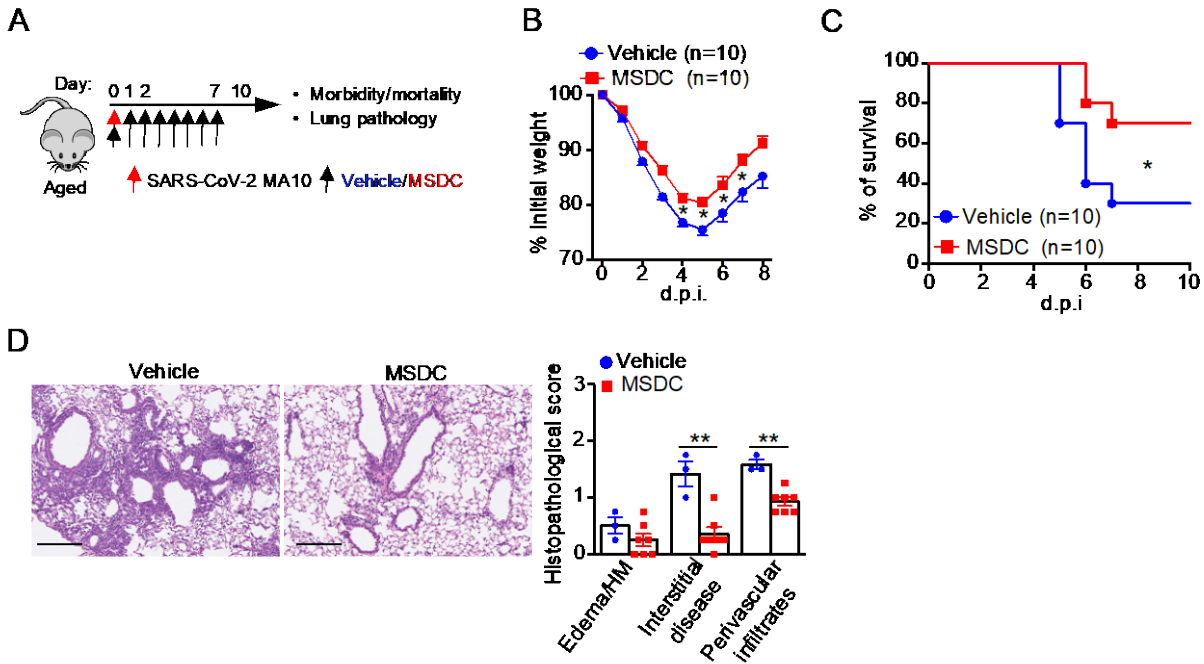

**Fig. S3. MSDC treatment decreases host morbidity and mortality following SARS-CoV-2 infection in aged mice.**

(A to D) Aged (13-14-month-old) C57BL/6 mice were infected with  $8 \times 10^4$  PFU of SARS-CoV-2 MA10 and treated with vehicle or MSDC. (A) Schematic diagram. Host morbidity (B) and mortality (C) were monitored. (D) H&E staining of lung section (n = 3-7) at 10 d.p.i. Scale bar, 200  $\mu$ m. Right, the quantification of pathological lesions. HM, hyaline membranes. Pooled data (B and C) from two independent experiments. Data are presented as means  $\pm$  SEM. \*,  $p < 0.05$ ; \*\*,  $p < 0.01$ . The  $p$  value was determined by multiple t-tests (B), Logrank test (C) or a two-tailed Student's t-test (D).

Figure S4

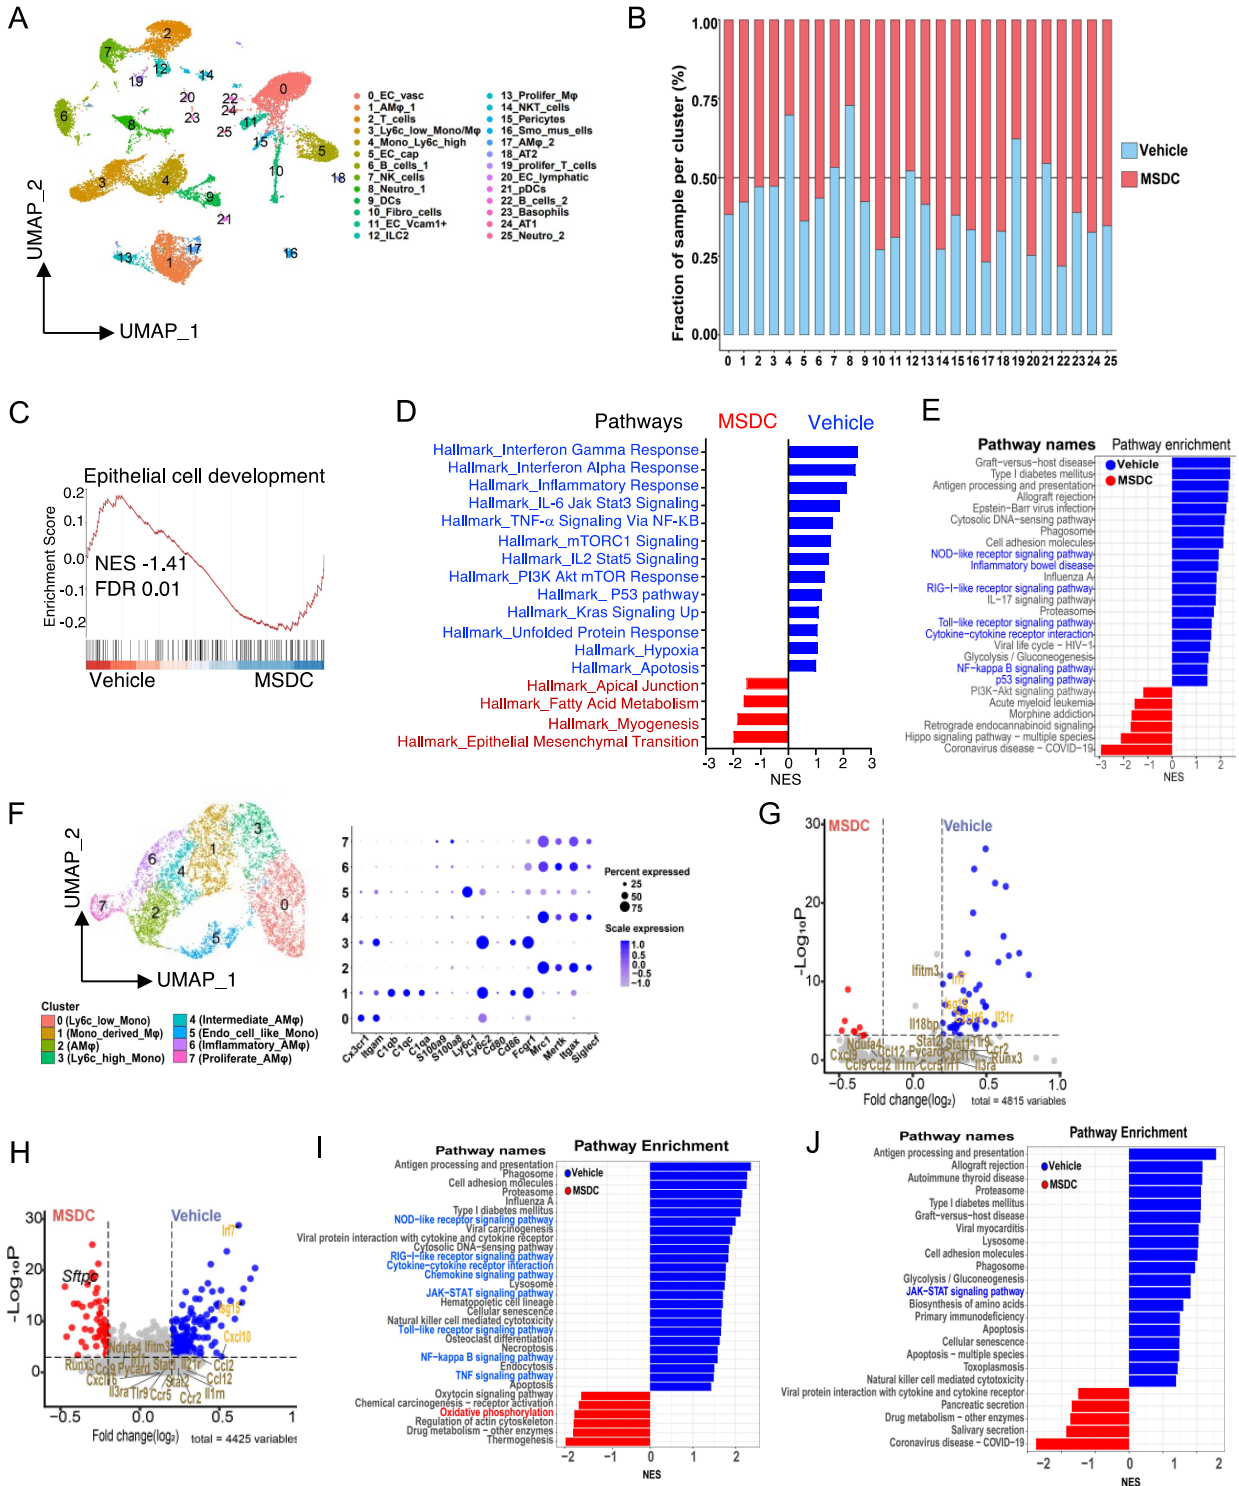

**Fig. S4. scRNA-seq analysis of IAV-infected lungs with or without MSDC treatment.**

(A to J) C57BL/6 WT mice were infected with IAV and treated with vehicle or MSDC. Lung cells were pooled from three individual mice from each group at 4 d.p.i, and subjected to scRNA-seq analysis. (A) UMAP plot visualization of major cell types across vehicle- or MSDC-treated lung cells. (B) The bar plot showing the relative contributions of each cluster by each studied subject. (C) GSEA of Epithelial cell development gene set was shown for lung epithelial cells (cluster 18 and 24). A negative normalized enrichment score (NES) value indicates enrichment in MSDC treatment lung cells. (D) Normalized enrichment scores of gene sets in lung cells from Hallmark dataset. (E) Normalized enrichment scores of gene sets in lung epithelial cells (cluster 18 and 24) from KEGG pathways. (F) UMAP showing clusters of monocytes and macrophages from (A) in vehicle- or MSDC- treated lung cells (left panel). A dot plot showing the percentage of cells expressing the selected marker genes using dot size and the average expression level of the genes in different clusters (right panel). (G and H) Volcano plot showing the differentially expressed genes in monocytes (cluster 0 and 3) (G) or monocyte derived macrophages (cluster 1) (H) of vehicle (blue) and MSDC (red) treated group. (I and J) Normalized enrichment scores of gene sets in lung AMs (cluster 2, 4, 6 and 7) (I) and combined monocytes and monocyte derived macrophages (cluster 0, 1 and 3) (J) from KEGG pathways.

Figure S5

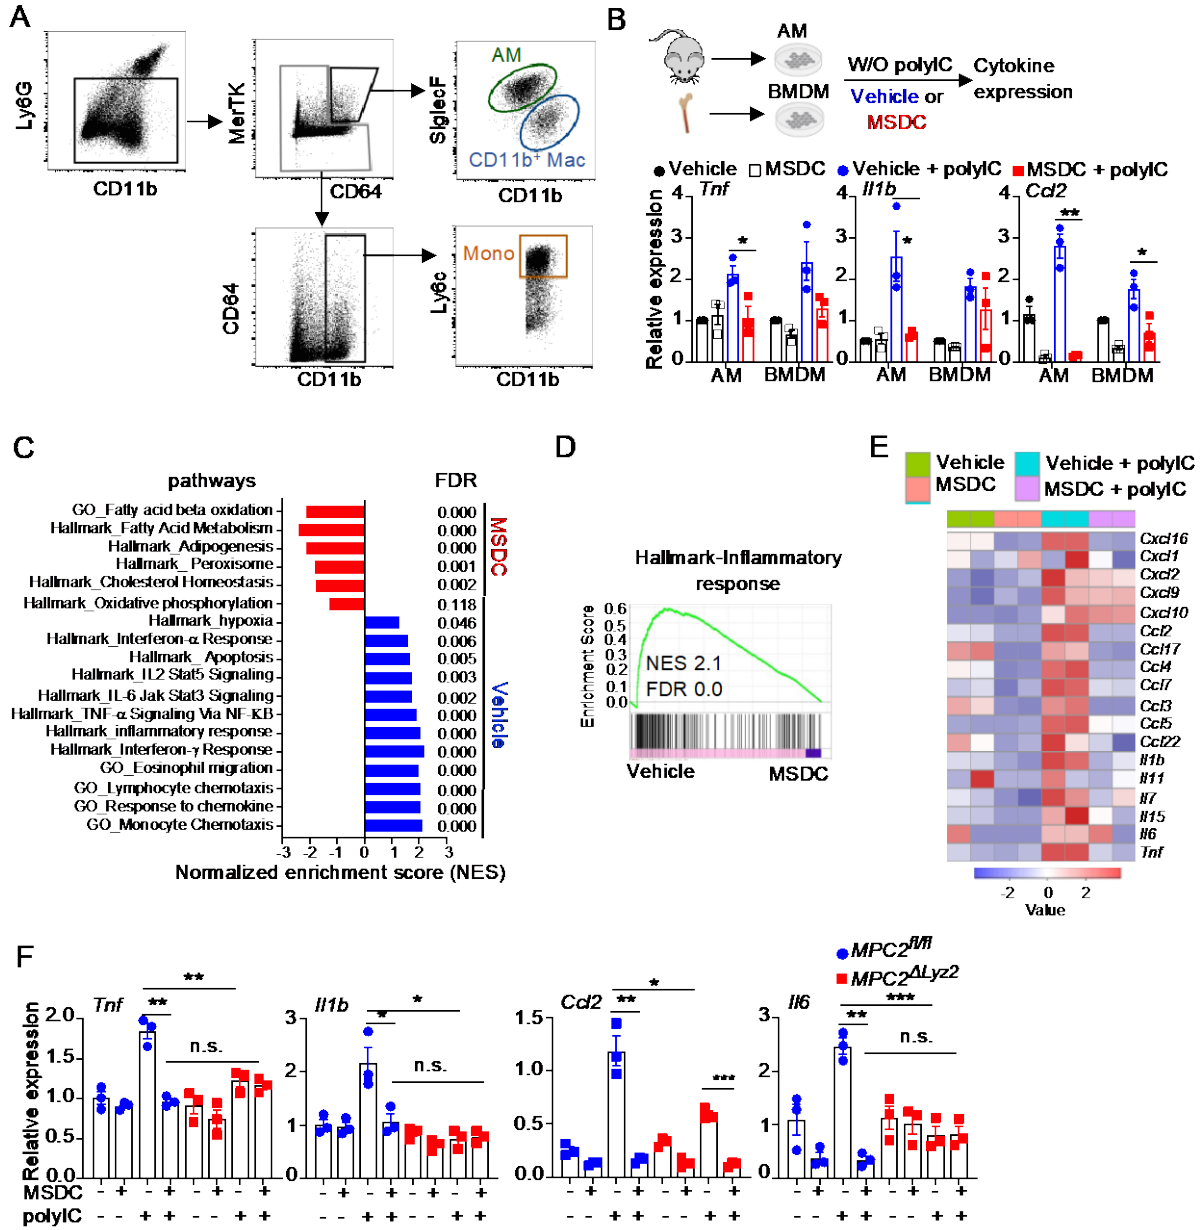



**Fig. S5. MSDC treatment reduces lung macrophage inflammation following IAV infection.**

(A) Flow cytometry gating strategy for sorting alveolar macrophages (AM), CD11b<sup>+</sup> macrophages (CD11b<sup>+</sup> Mac) and monocytes (Mono). (B) Relative inflammatory gene expression in mouse AMs or BMDM stimulated with or without Poly IC in the presence of vehicle or MSDC overnight *in vitro*. (C to E) RNA-seq analysis of mouse AMs stimulated with or without Poly IC in the presence of vehicle or MSDC overnight *in vitro*. (C) Normalized enrichment scores of gene sets in Poly IC stimulated AMs with vehicle or MSDC treatment from Hallmark and GO dataset. (D) GSEA of Inflammatory response gene set was shown for Poly IC stimulated AMs with vehicle or MSDC treatment. (E) Heatmap for differentially expressed cytokine/chemokine genes were shown. (F) *Tnf*, *Il1b*, *Ccl2*, and *Il6* gene expression in WT (*MPC2<sup>fl/fl</sup>*) or MPC2-deficient (*MPC2<sup>ΔLyz2</sup>*) AMs with indicated treatment overnight *in vitro*. Data are presented as means ± SEM. \*,  $p < 0.05$ ; \*\*,  $p < 0.01$ ; \*\*\*,  $p < 0.001$ . The  $p$  value was determined by one-way ANOVA (B and F).

Figure S6

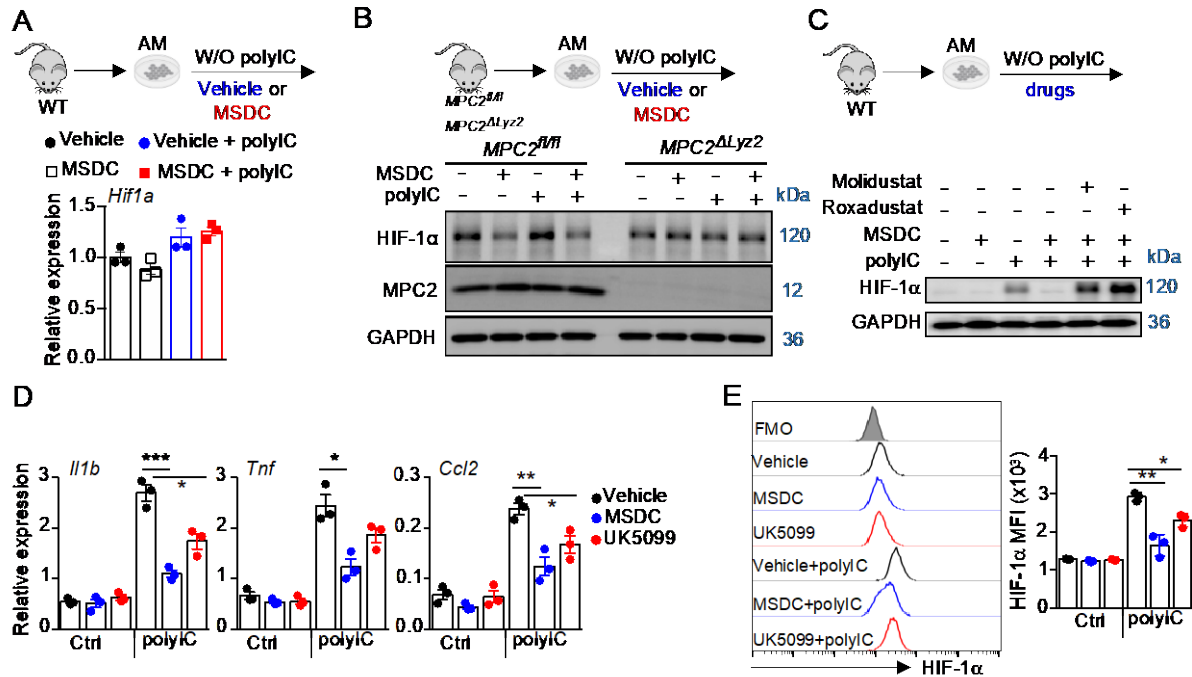

**Fig. S6. MPC inhibition decreases HIF-1α levels in lung macrophages.**

(A) The mRNA levels of *Hif1a* in AMs stimulated with or without Poly IC in the presence of vehicle or MSDC overnight *in vitro*. (B) HIF-1α and MPC2 protein levels in WT (*MPC2<sup>fl/fl</sup>*) or MPC2-deficient (*MPC2<sup>ΔLyz2</sup>*) AMs stimulated with or without Poly IC in the presence of vehicle or MSDC overnight *in vitro*. (C) HIF-1α protein levels in AMs with indicated treatment overnight *in vitro*. (D and E) *Il1b*, *Tnf* and *Ccl2* gene expression (D) and HIF-1α levels (E) in AMs stimulated with or without Poly IC in the presence of MSDC, UK5099 or vehicle overnight *in vitro*. Data are presented as means ± SEM. \*,  $p < 0.05$ ; \*\*,  $p < 0.01$ ; \*\*\*,  $p < 0.001$ . The  $p$  value was determined by one-way ANOVA (D and E).

Figure S7

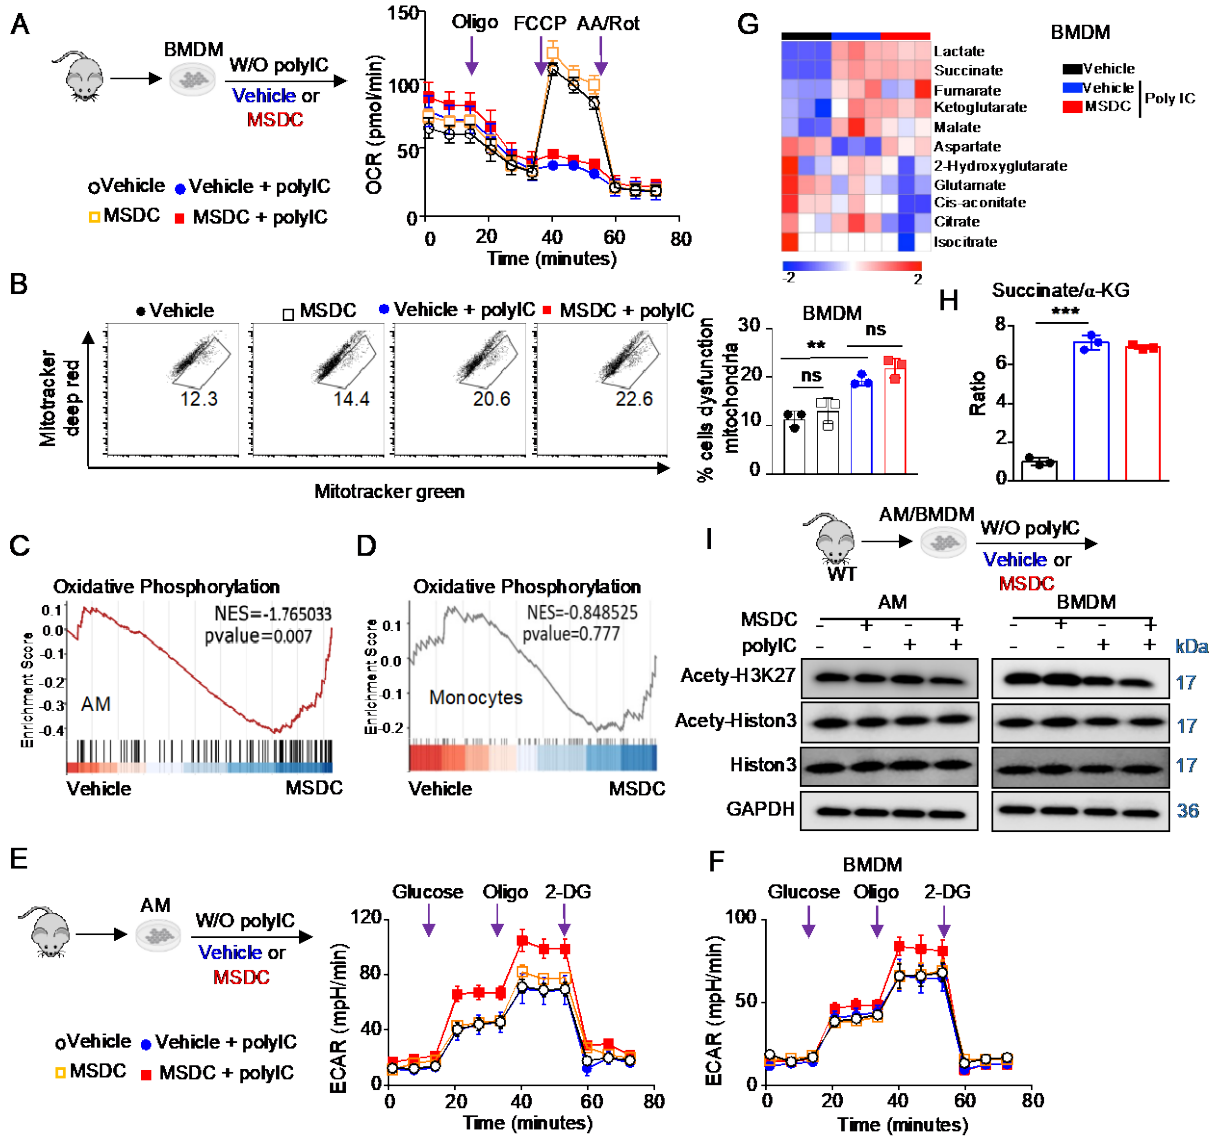

**Fig. S7. MPC inhibition does not alter mitochondrial fitness in BMDM.**

(A and B) BMDM were stimulated with or without Poly IC in the presence of vehicle or MSDC overnight *in vitro*. (A) OCR was measured in BMDM. (B) Flow cytometry showing mitochondrial mass by Mitotracker green versus Mitotracker deep red in BMDM and quantification on the right. (C and D) GSEA of Oxidative Phosphorylation gene set was shown for Poly IC stimulated AMs (C) and BMDM (D) with vehicle or MSDC treatment. (E and F) ECAR was measured in AMs (E) and BMDM (F) stimulated with or without Poly IC in the presence of vehicle or MSDC overnight *in vitro*. (G) Heatmap showing TCA cycle metabolites measured in BMDMs (n = 3). (H) Succinate to Ketoglutarate ( $\alpha$ -KG) ratios in (G). (I) Immunoblot analysis of K27-acetylated histone3 (Acety-H3K27), acetylated histone3 (Acety-Histon3) and histone3 protein levels in AMs (left) and BMDM (right) stimulated with or without Poly IC in the presence of vehicle or MSDC overnight *in vitro*. Data are presented as means  $\pm$  SEM. \*\*,  $p < 0.01$ . The  $p$  value was determined by one-way ANOVA (B) and a two-tailed Student's t-test (H).

Figure S8

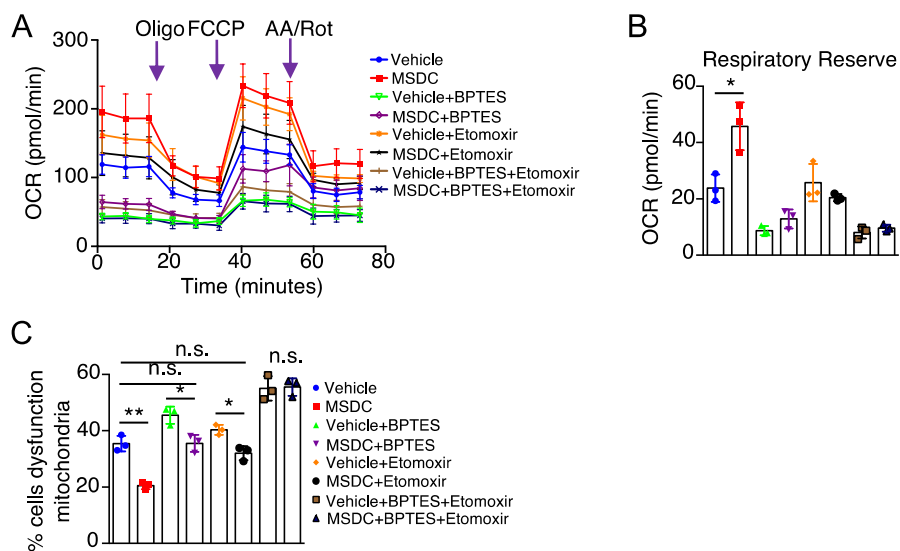

**Fig. S8. Utilization of fatty acid or glutamine oxidation in AMs with MPC inhibition.**

(A to C) AMs were stimulated with Poly IC in the presence of vehicle or MSDC combined with BPTES and/or Etomoxir overnight *in vitro*. OCR of AMs (A) and quantification of respiratory reserve (B). Quantification of flow cytometry showing mitochondrial mass by Mitotracker green versus Mitotracker deep red in AMs (C). Data are presented as means  $\pm$  SEM. \*,  $p < 0.05$ ; \*\*,  $p < 0.01$ . The  $p$  value was determined by one-way ANOVA (B and C).

Figure S9

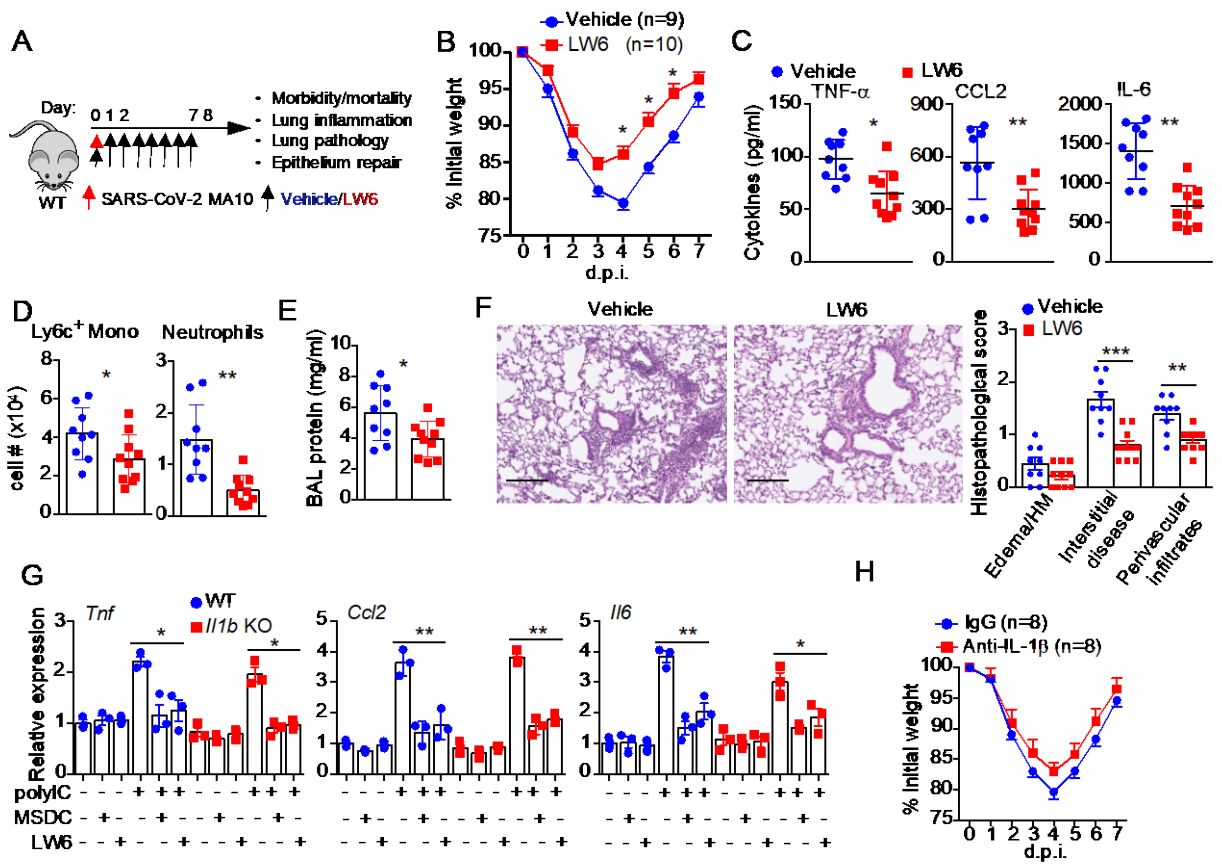

**Fig. S9. HIF-1 $\alpha$  inhibition ameliorates SARS-CoV-2-caused pulmonary inflammation.**

(A to F) C57BL/6 WT mice were infected with SARS-CoV-2 MA10 virus and treated with vehicle or HIF-1 $\alpha$  inhibitor LW6 (n = 9-10). (A) Schematic diagram. (B) Host morbidity was monitored. (C) BAL cytokine levels at 8 d.p.i. (D) Numbers of Ly6c<sup>+</sup> inflammatory monocytes and neutrophils in the BAL at 8 d.p.i. (E) Protein concentrations in the BAL at 8 d.p.i. (F) Representative image of H&E staining of lung section at 8 d.p.i. Scale bar, 200  $\mu$ m (left). Right, the quantification of pathological lesions. HM, hyaline membranes. (G) *Tnf*, *Ccl2* and *Il6* gene expression in AMs from WT or *Il1b* ko mice that stimulated with or without Poly IC in the presence of MSDC, LW6 or vehicle overnight *in vitro*. (H) C57BL/6 WT mice were infected with SARS-CoV-2 MA10 virus, and were administered by intraperitoneal with 400  $\mu$ g IgG or Anti-IL-1 $\beta$  antibodies at day 1 and day 3 post infection. Pooled data (B to E, and H) from two independent experiments. Data are presented as means  $\pm$  SEM. \*,  $p < 0.05$ . \*\*,  $p < 0.01$ . The  $p$  value was determined by multiple t-tests (B and H), a two-tailed Student's t-test (C to F) or one-way ANOVA (G).

Figure S10

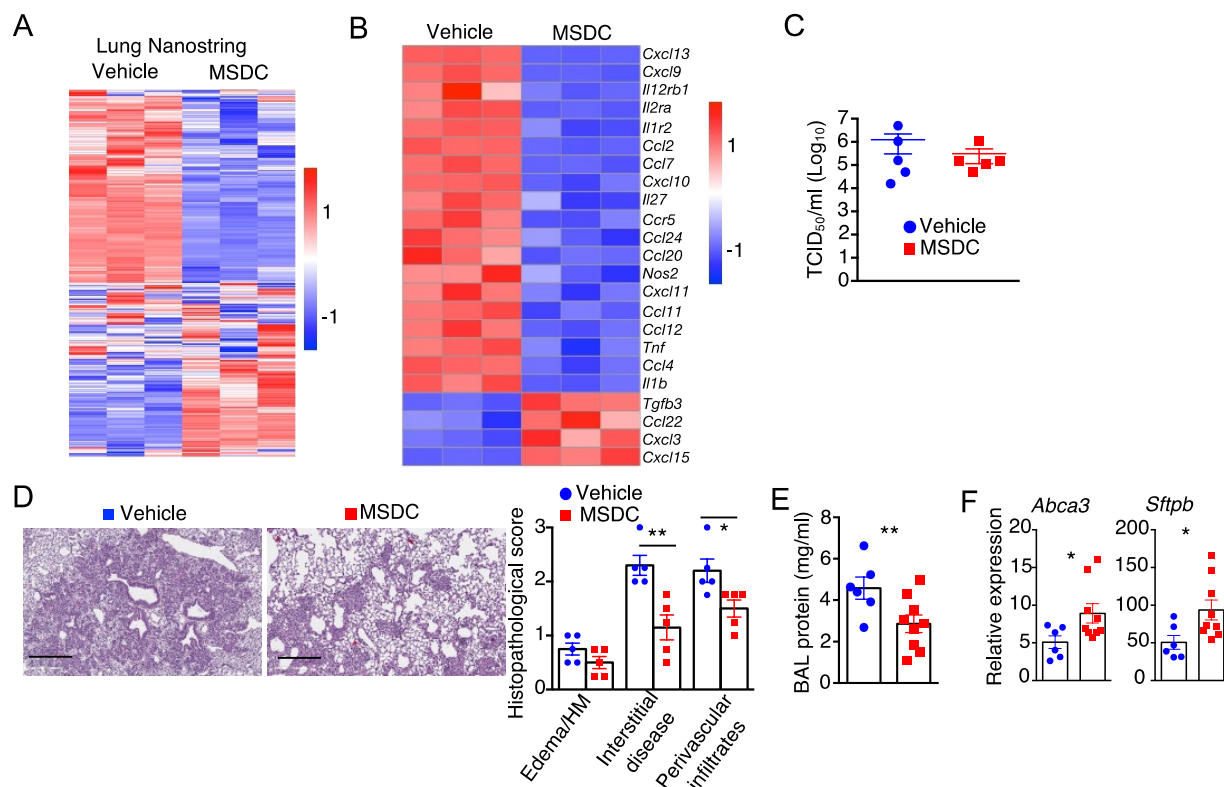

**Fig. S10. MSDC treatment ameliorates lung inflammation and promotes tissue recovery following IAV infection in DIO mice.**

(A to F) DIO mice were infected with IAV and treated with vehicle or MSDC. (A and B) Nanostring analysis of the expression of 560 immune-related genes (Mouse Immunology Panel) in lungs at 5 d.p.i. (n = 3). Heatmap for total differentially expressed genes (A) or differentially expressed cytokine/chemokine genes (B) were shown. (C) BAL viral titers were measured at 5 d.p.i. (n = 5). (D) Representative image of H&E staining of lung section (n = 5) at 15 d.p.i. Scale bar, 200  $\mu$ m (left). Right, the quantification of pathological lesions. HM, hyaline membranes. (E) Protein concentrations in the BAL at 15 d.p.i. (n = 6-9). (F) *Abca3* and *Sftpb* gene expression in the lungs at 15 d.p.i. (n = 6-9). Pooled data (E and F) from two independent experiments. Data are presented as means  $\pm$  SEM. \*,  $p < 0.05$ ; \*\*,  $p < 0.01$ . The  $p$  value was determined by a two-tailed Student's t-test (C to F).



Figure S11

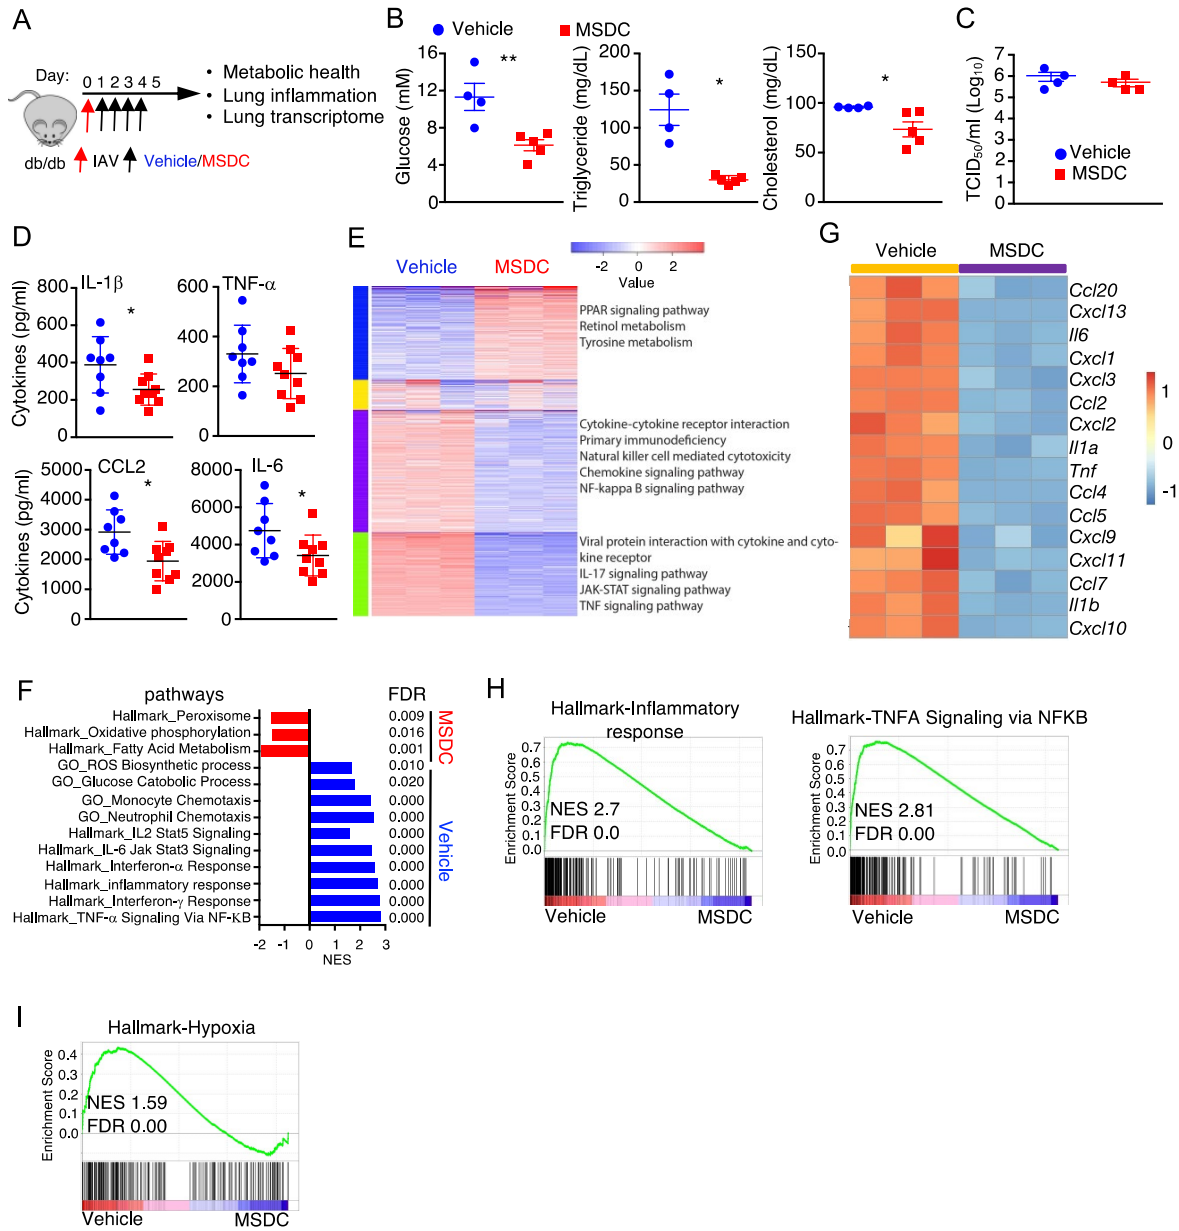

**Fig. S11. MSDC treatment simultaneously targets hyperglycemia and hyper-inflammation following IAV infection in db/db mice.**

(A to I) The db/db mice were infected with IAV and treated with vehicle or MSDC for 5 days. (A) Schematic diagram. (B) The concentrations of glucose, triglyceride and total cholesterol in the blood (n = 4-5) at 5 d.p.i. (C) BAL viral titers were measured (n = 4) at 5 d.p.i. (D) BAL cytokine levels (n = 8-9) at 5 d.p.i. (E-I) RNA-seq analysis of lungs (n = 3) at 5 d.p.i. (E) Heatmap of differentially expressed genes. (F) Normalized enrichment scores of gene sets from Hallmark and GO dataset. (G) Heatmap showing differentially expressed cytokines. (H and I) GSEA of inflammatory response or TNF signaling (H) and hypoxia (I) gene sets were shown. Representative (B) or pooled data (D) from two independent experiments. Data are presented as means  $\pm$  SEM \*,  $p < 0.05$ ; \*\*,  $p < 0.01$ . The  $p$  value was determined by a two-tailed Student's t-test (B to D).

Figure S12

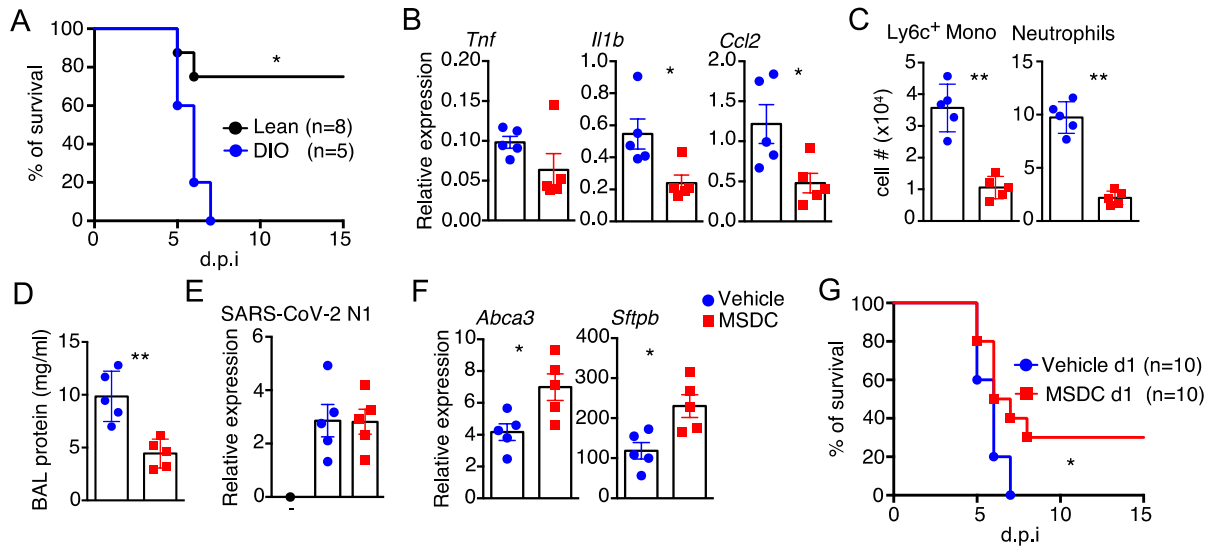

**Fig. S12. MSDC treatment decreases lung inflammation and promotes tissue recovery following SARS-CoV-2 infection in DIO mice.**

(A) DIO or Lean mice were infected with SARS-CoV-2 MA10 and treated with vehicle. Host mortality was monitored. (B-F) DIO mice were infected with SARS-CoV-2 MA10 virus and treated with vehicle or MSDC starting at 6 h post infection ( $n = 5$ ). (B) The mRNA levels of *Tnf*, *Il1b* and *Ccl2* in lungs at 5 d.p.i. (C) Quantification of  $Ly6c^+$  inflammatory monocytes ( $CD11b^+ Ly6c^+$ ) and neutrophils ( $CD11b^+ Ly6G^+$ ) in the BAL at 5 d.p.i. (D) Protein concentrations in the BAL at 5 d.p.i. (E) RT-qPCR detection of SARS-CoV-2 N1 gene in the lungs. -, negative control of IAV-infected lungs. (F) *Abca3* and *Sftpb* gene expression in the lungs at 5 d.p.i. (G) DIO mice were infected with SARS-CoV-2 MA10 virus and treated with vehicle or MSDC starting at 1 day post infection. Host mortality was monitored. Data are presented as means  $\pm$  SEM. \*,  $p < 0.05$ ; \*\*,  $p < 0.01$ . The  $p$  value was determined by Logrank test (A and G) or a two-tailed Student's t-test (B to F).

Figure S13

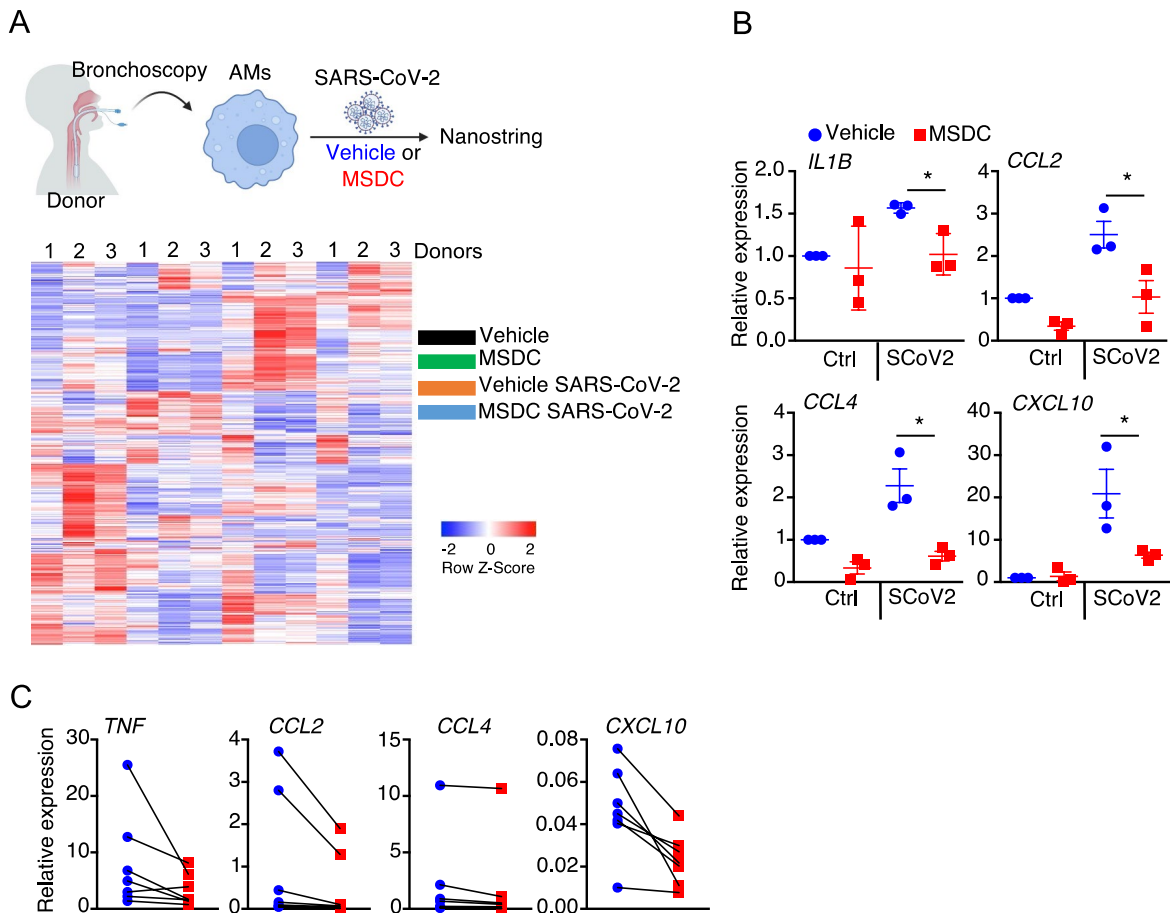

**Fig. S13. MSDC treatment reduces SARS-CoV-2-induced inflammatory cytokine expression in human AMs.**

(A-B) Human AMs from BAL of non-infectious donors were infected with or without SARS-CoV-2 in the presence of vehicle or MSDC (n = 3 donors) for 48 h *in vitro*. (A) Nanostring analysis of the expression of immune-related genes (human myeloid innate immunity panel) in AMs. Heatmap for total differentially expressed genes was shown. (B) Pro-inflammatory cytokine expression in AMs was measured by RT-qPCR. (C) Cytokine expression in lung cells from COVID-19 patient autopsies following vehicle or MSDC treatment *ex vivo* (n = 7 subjects). Target gene expression relative to *Hprt* was shown. Data are presented as means ± SEM. \*,  $p < 0.05$ . The  $p$  value was determined by one-way ANOVA (B).

Figure S14

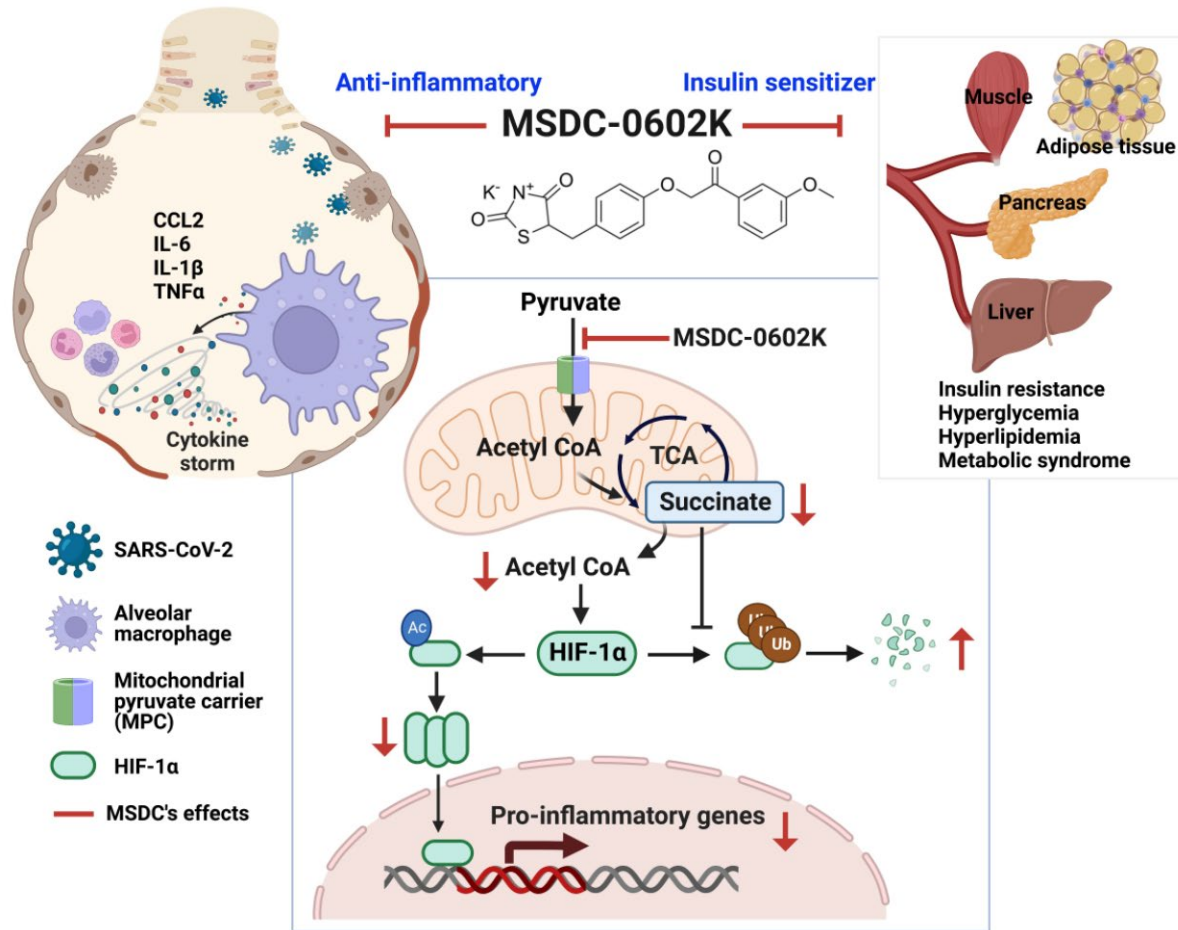

Fig. S14. Graphical summary.

Concurrent promotion of host metabolic health and suppression of hyper pulmonary inflammation by targeting mitochondria pyruvate translocation.

**Table S1. Primers used in quantitative RT-PCR**

| Primers for mouse mRNA expression    |                          |                          |
|--------------------------------------|--------------------------|--------------------------|
| Gene symbol                          | 5' primer (5'-3')        | 3' primer (5'-3')        |
| <i>Abca3</i>                         | TTCTGGTTCTCCGCTCTGTT     | GTACATGAGGGGGATGATGG     |
| <i>Ccl2</i>                          | GTCACCAAGCTCAAGAGAGAGGTC | CCTACAGAAGTGCTTGAGGTGGTT |
| <i>Hif1a</i>                         | TCAAGTCAGCAACGTGGAAG     | TATCGAGGCTGTGTCGACTG     |
| <i>Hprt</i>                          | CTCCGCCGGCTTCCTCCTCA     | ACCTGGTTCATCATCGCTAATC   |
| <i>Il1b</i>                          | GGGCCTCAAAGGAAAGAATC     | TACCAGTTGGGGAACCTCTGC    |
| <i>Sftpb</i>                         | CTGTGCCAAGAGTGTGAGGA     | TTGGGGTTAATCTGGCTCTG     |
| <i>Tnf</i>                           | CATGCGTCCAGCTGACTAAA     | TCCCCTTCATCTTCCTCCTT     |
|                                      |                          |                          |
| Primers for human mRNA expression    |                          |                          |
| Gene symbol                          | 5' primer (5'-3')        | 3' primer (5'-3')        |
| <i>CCL2</i>                          | AGCAAGTGTCCCAAAGAAGC     | TGGAATCCTGAACCCACTTC     |
| <i>CCL4</i>                          | CTTCCTCGCAACTTTGTGGT     | TCACTGGGATCAGCACAGAC     |
| <i>CXCL10</i>                        | GAATCGAAGGCCATCAAGAA     | CCTCTGTGTGGTCCATCCTT     |
| <i>HPRT</i>                          | GACCAGTCAACAGGGGACAT     | CTGCATTGTTTTGCCAGTGT     |
| <i>IL1B</i>                          | GGACAAGCTGAGGAAGATGC     | TCGTTATCCCATGTGTCGAA     |
| <i>TNF</i>                           | AACCTCCTCTCTGCCATCAA     | GGAAGACCCCTCCAGATAG      |
|                                      |                          |                          |
| Primers for SARS-CoV-2 N1 expression |                          |                          |
| Gene symbol                          | 5' primer (5'-3')        | 3' primer (5'-3')        |
| <i>NI</i>                            | GACCCCAAATCAGCGAAAT      | TCTGGTTACTGCCAGTTGAATCTG |
